# Supplementary material for: Improved rate capability and cycling stability of bicontinuous hierarchical mesoporous LiFePO4/C microbelts for lithium-ion batteries
Source: Royal Society of Chemistry journal article supplement (doi:10.1039/c7nj02554h), 2017-01-01
Supplement: c7nj02554h1.pdf [file c7nj02554h1.pdf]

## Electronic Supplementary Information

### Improved rate capability and cycle stability of bicontinuous hierarchical mesoporous LiFePO<sub>4</sub>/C microbelts for lithium-ion batteries

Yue Zhang,<sup>a</sup> Yudai Huang,<sup>a,\*</sup> Yakun Tang,<sup>a</sup> Hongyang Zhao,<sup>b</sup> Yanjun Cai,<sup>a</sup> Xingchao Wang,<sup>a</sup> Yong Guo,<sup>a</sup> Diansheng Jia,<sup>a,\*</sup> and Jun Zong<sup>c</sup>

<sup>a</sup> Key Laboratory of Energy Materials Chemistry, Ministry of Education,

Key Laboratory of Advanced Functional Materials, Autonomous Region,

Institute of Applied Chemistry, Xinjiang University, Urumqi 830046, Xinjiang, China

<sup>b</sup> Frontier Institute of Chemistry, Frontier Institute of Science and Technology jointly

with College of Science, State Key Laboratory for Mechanical Behavior of Materials,

Xi'an Jiaotong University, Xi'an Shaanxi Province, 710054, China.

<sup>c</sup> Solar Energy Technology Research Department, State Power Investment Central

Research Institute, Beijing, 100029, P. R. China.

E-mail: huangyd@xju.edu.cn, jdz@xju.edu.cn.

**Table S1.** Solubility of LFP precursor salts ( $\text{LiH}_2\text{PO}_4$ ,  $\text{Fe}(\text{NO}_3)_3$ ) in different solvents

| Solvent                           | DMF:H <sub>2</sub> O=1:1<br>(volume ratio) | H <sub>2</sub> O | DMF   |
|-----------------------------------|--------------------------------------------|------------------|-------|
| Solubility of precursors (g/100g) | 180.6                                      | 338.62           | 39.42 |

**Table S2.** The calculated  $\text{Li}^+$  diffusion coefficients for LFP1 and LFP2 at scan rates from 0.4 to  $0.8 \text{ mV s}^{-1}$ .

| D ( $\text{cm}^2\text{s}^{-1}$ ) | Oxidation (charge)     | Reduction (discharge)  |
|----------------------------------|------------------------|------------------------|
| LFP1                             | $1.67 \times 10^{-11}$ | $1.31 \times 10^{-11}$ |
| LFP2                             | $5.46 \times 10^{-12}$ | $3.65 \times 10^{-12}$ |

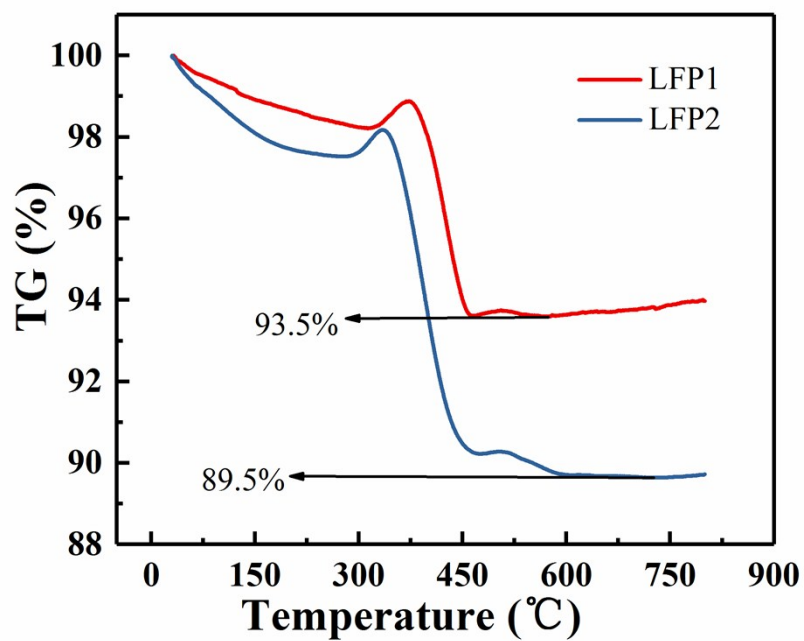**Fig. S1** TGA analysis of LFP1 and LFP2.

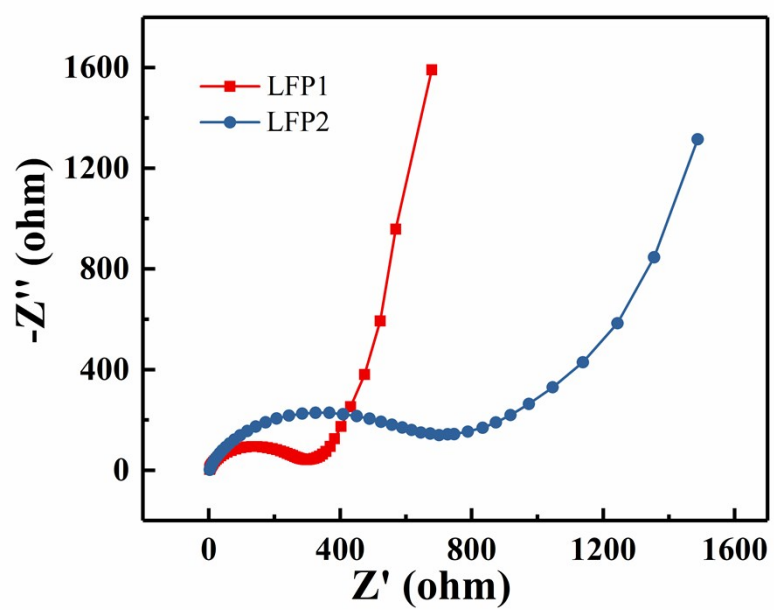

**Fig. S2** Nyquist plots of the two samples.
